# Supplementary material for: Predictive Value of Echocardiographic Pulmonary to Left Atrial Ratio for In-Hospital Death in Patients with COVID-19
Source: MDPI journal article supplement (doi:10.3390/diagnostics13020224), 2023-01-07

**Supplementary Table S1.** Clinical characteristics of survivor and non-survivor patients with COVID-19.

|                                 | Survivors<br>n= 79 | Non-survivors<br>n= 21 | P value          |
|---------------------------------|--------------------|------------------------|------------------|
| Age (years)                     | 61.8±15.3          | 76.6±9.0               | <b>&lt;0.001</b> |
| Gender female                   | 29 (36.7)          | 9 (23.7)               | 0.606            |
| Body weight (Kg)                | 82.3±18.2          | 75.3±15.1              | 0.110            |
| BMI (Kg/m <sup>2</sup> )        | 28.4±5.3           | 27.3±4.9               | 0.384            |
| BSA (m <sup>2</sup> )           | 1.9±0.2            | 1.8±0.2                | 0.062            |
| Arterial Hypertension           | 47 (59.5)          | 17 (81.0)              | 0.069            |
| Dyslipidemia                    | 33 (41.8)          | 8 (38.1)               | 0.761            |
| Diabetes mellitus               | 18 (22.8)          | 10 (47.6)              | <b>0.024</b>     |
| Smoking                         | 12 (15.2)          | 4 (19.1)               | 0.668            |
| Ischemic Heart Disease          | 9 (11.4)           | 4 (19.1)               | 0.354            |
| Non-Ischemic Heart Disease      | 11 (13.9)          | 3 (14.3)               | 0.966            |
| Previous PCI                    | 6 (7.6)            | 4 (19.1)               | 0.120            |
| Previous CABG                   | 3 (3.8)            | 2 (9.5)                | 0.285            |
| Atrial Fibrillation             | 10 (12.7)          | 5 (23.8)               | 0.203            |
| COPD                            | 10 (12.7)          | 3 (14.3)               | 0.844            |
| Active Cancer                   | 5 (6.3)            | 4 (19.1)               | 0.070            |
| History of cancer               | 7 (8.9)            | 4 (19.1)               | 0.185            |
| Autoimmune Disease              | 7 (8.9)            | (14.3)                 | 0.461            |
| Chronic renal failure           | 7 (8.9)            | 8 (38.1)               | <b>0.001</b>     |
| Chronic liver disease           | 0 (0.0)            | 2 (9.5)                | <b>0.006</b>     |
| Severe ARDS at ED presentation  | 21 (26.6)          | 15 (71.4)              | <b>&lt;0.001</b> |
| Systolic Blood Pressure (mmHg)  | 131.1±18.0         | 130.3±23.3             | 0.856            |
| Diastolic Blood Pressure (mmHg) | 76.2±12.7          | 71.8±11.8              | 0.151            |
| Heart Rate (bpm)                | 86.7±17.6          | 85.1±16.4              | 0.709            |
| Arterial Oxygen Saturation (%)  | 92.2±6.7           | 88.3±11.2              | <b>0.047</b>     |
| P/F at presentation             | 251.4±80.1         | 179.0±85.5             | <b>&lt;0.001</b> |

Data are expressed as number (%) or mean ± standard deviation. ARDS = acute respiratory distress syndrome; BMI = body mass index; BSA = body surface area; CABG = coronary artery bypass graft; COPD = chronic obstructive pulmonary disease; ED = emergency department; PCI = percutaneous coronary intervention; P/F = PaO<sub>2</sub>/FiO<sub>2</sub>. Statistically significant p values are reported in bold.

**Supplementary Figure S1.** Reproducibility assessment between two operators in a random sample of 15 patients (8 from Maggiore della Carità Hospital and 7 patients from SS. Annunziata Hospital) for 4 meaningful echocardiographic parameters: left ventricle ejection fraction (LVEF, **panel A**), tricuspid regurgitation velocity (**panel B**), E/e' ratio (**panel C**), and ePLAR (**panel D**). All four parameters resulted in a strong correlation between operators.

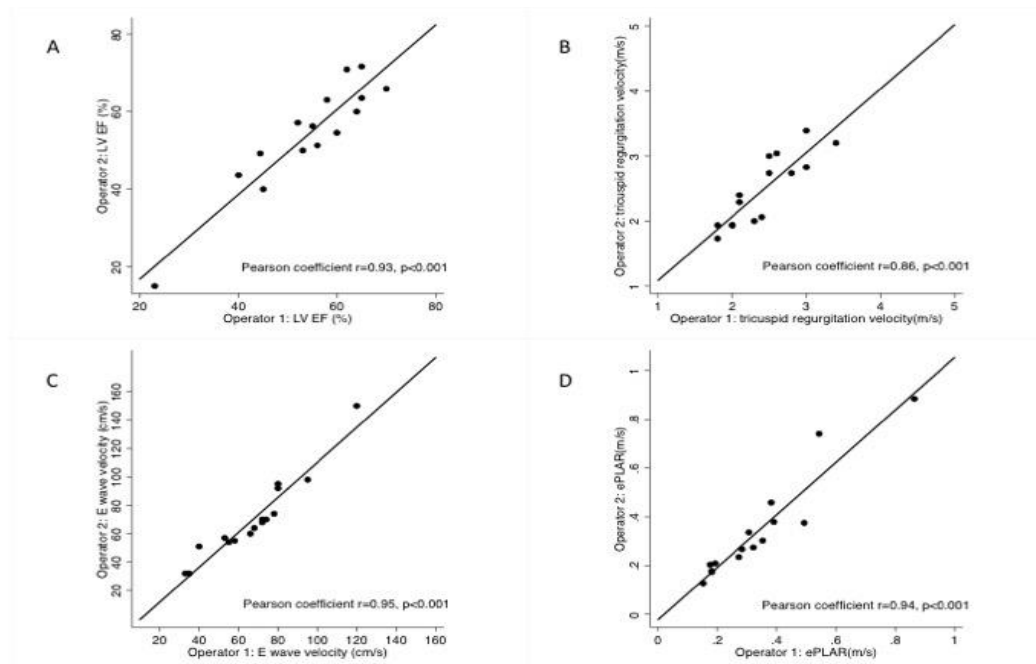

Supplement: s1 [file s1]
